# Supplementary material
Source: PubMed Central journal article supplement (PMC2268031)
Supplement: NIHMS41825-supplement-Figs_S1__S2.pdf [file NIHMS41825-supplement-Figs_S1__S2.pdf]

**Supplemental Data:**

**Evidence for dual mode of action of a thiosemicarbazone, NSC73306: A  
potent substrate of the multidrug resistance-linked ABCG2 transporter**

Chung-Pu Wu, Suneet Shukla, Anna Maria Calcagno, Matthew D. Hall, Michael M. Gottesman  
and Suresh V. Ambudkar

Laboratory of Cell Biology, Center for Cancer Research, National Cancer Institute, National  
Institutes of Health, Bethesda, Maryland 20892-4256, USA

Wu et al, Supplementary, Figure 1

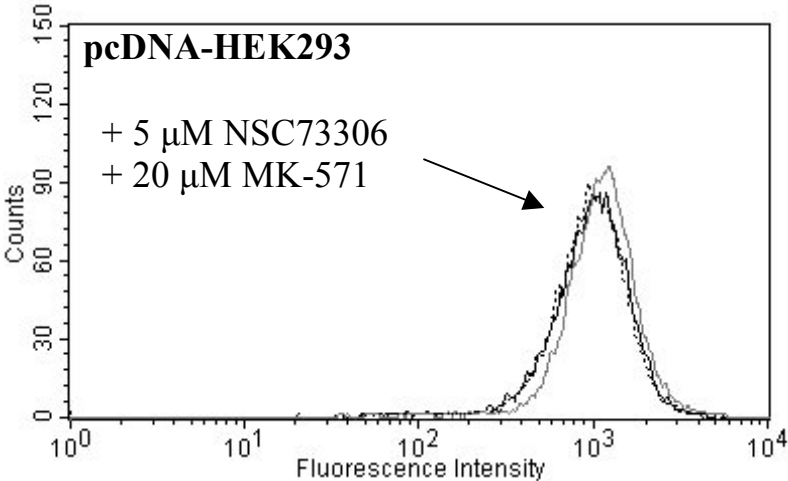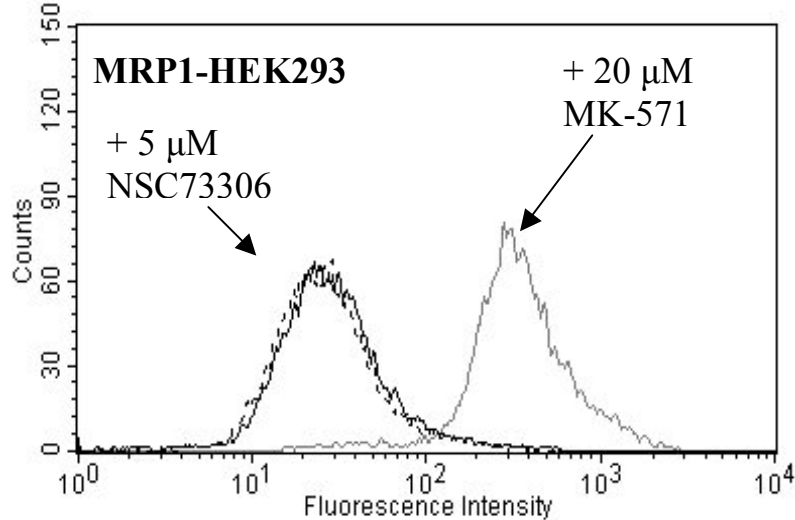

Wu et al, Supplementary, Figure 2

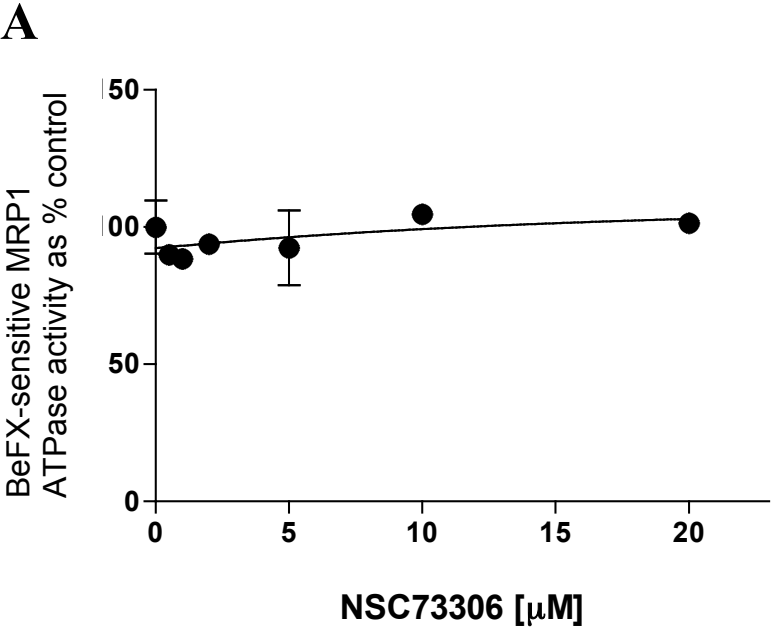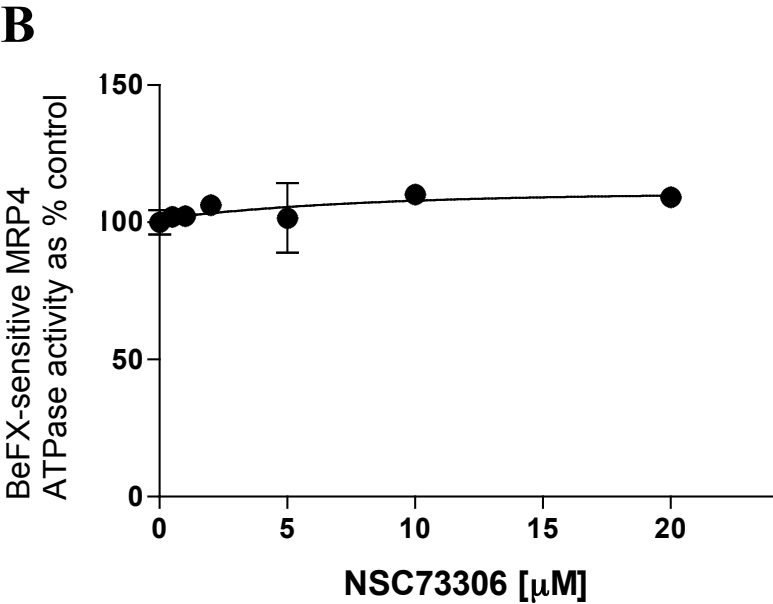

## Figure Legends: Supplementary data.

**Figure 1. Effect of NSC73306 on calcein accumulation in MRP1-HEK293 cells.** Cells (control pcDNA-HEK293 and MRP-transfected MRP1-HEK293) were resuspended in IMDM supplemented with 5% fetal bovine serum. 0.25  $\mu$ M calcein-AM was added to the cells in the presence or absence of NSC73306 and MK-571. Cells were incubated at 37°C in the dark for 10 min. The cells were pelleted by centrifugation at 500 $\times$  g and resuspended in 300  $\mu$ L of PBS containing 0.1% bovine serum albumin. Thin solid lines represent cells in the absence of drug, dotted lines represent cells in the presence of 5  $\mu$ M NSC73306 and grey solid lines represent cells in the presence of 20  $\mu$ M MK-571. Samples were analyzed immediately by using FACS. Representative histograms from three independent experiments are shown.

**Figure 2. Effect of NSC73306 on MRP1- and MRP4-mediated hydrolysis.** Crude membranes of MRP1 (*A*) or MRP4 (*B*) baculovirus-infected High Five insect cells (100  $\mu$ g/mL protein) were incubated at 37°C for 5 min with NSC73306 in the presence or absence of BeFx. The reaction was initiated by the addition of 5 mM ATP and terminated with SDS (2.5% final concentration) after 20 min incubation at 37°C. The amount of  $P_i$  released was quantitated using a colorimetric method (1, 2). Values represent mean  $\pm$  S.E.M. from at least three independent experiments.

1. Kerr KM, Sauna ZE, Ambudkar SV. Correlation between steady-state ATP hydrolysis and vanadate-induced ADP trapping in Human P-glycoprotein. Evidence for ADP release as the rate-limiting step in the catalytic cycle and its modulation by substrates. *J Biol Chem* 2001;276:8657-64.
2. Sauna ZE, Nandigama K, Ambudkar SV. Multidrug resistance protein 4 (ABCC4)-mediated ATP hydrolysis: effect of transport substrates and characterization of the post-hydrolysis transition state. *J Biol Chem* 2004;279:48855-64.
